# Supplementary material for: Aptamer-conjugated core–shell magnetic nanoparticles for quick and specific separation of gram-negative bacteria
Source: Royal Society of Chemistry journal article supplement (doi:10.1039/d5ra06380a), 2025-01-01
Supplement: d5ra06380a1.pdf [file d5ra06380a1.pdf]

## Supplementary

### Aptamer-conjugated Core-shell Magnetic Nanoparticles for Quick and Specific Separation of Gram-negative Bacteria

Rakshya Panta,<sup>a</sup> Chao Lu,<sup>b</sup> Howyn Tang,<sup>a</sup> and Jin Zhang<sup>a,b\*</sup>

<sup>a</sup> School of Biomedical Engineering, University of Western Ontario, London, Ontario, Canada N6A 5B9

<sup>b</sup> Department of Chemical and Biochemical Engineering, University of Western Ontario, London, Ontario, Canada N6A 5B9

S1. Absorbance of Aptamer 8.28A at 260 nm

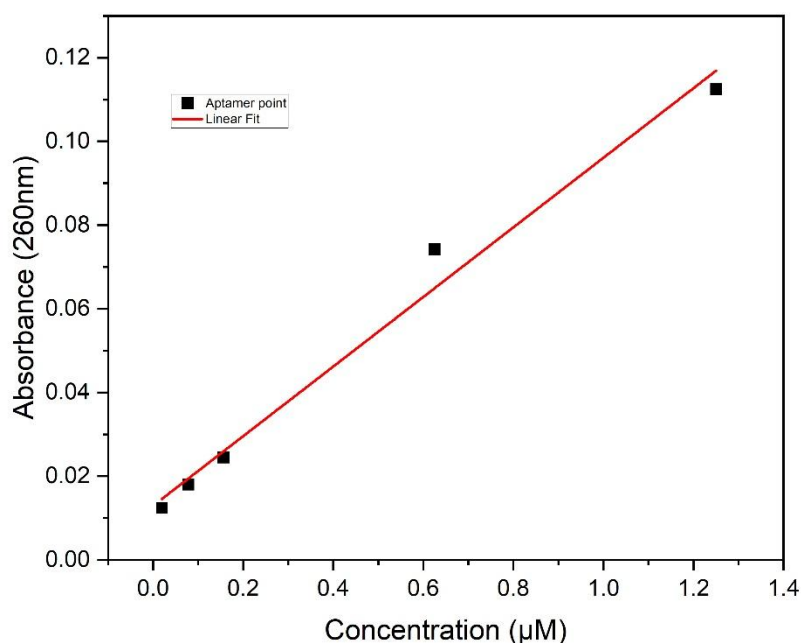

Fig. S1. Calibration curve of aptamer absorbance versus concentration. Black squares represent measured absorbance points used to generate the linear fit (red line).

S2. Determine the bacteria number

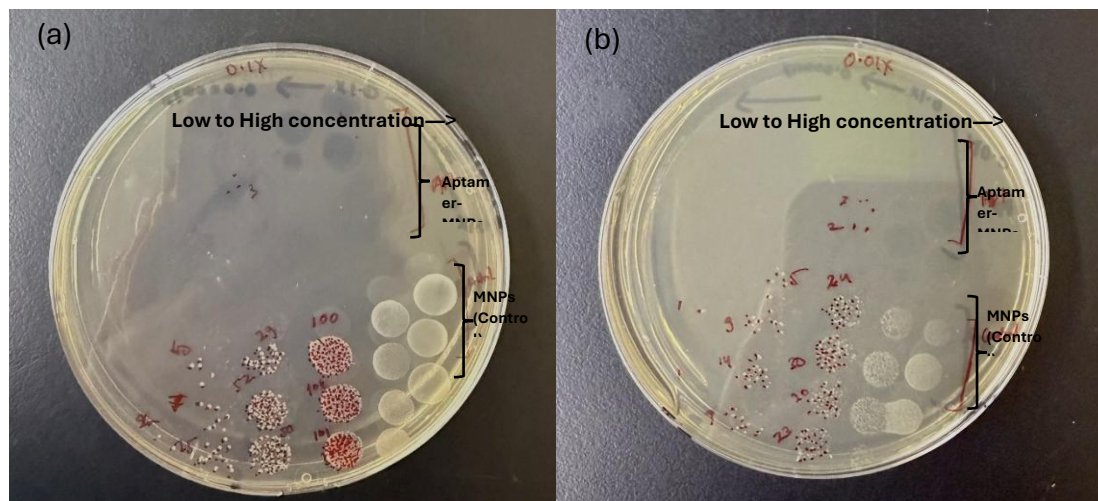

Fig. S2. Plate count to determine the bacteria number in the supernatant of diluted solutions after magnetic separation with aptamer-  $\text{Fe}_3\text{O}_4@\text{SiO}_2$  MNPs and control ( $\text{Fe}_3\text{O}_4@\text{SiO}_2$  MNPs). (a) Bacterial colony morphology observed in the supernatant of the stock suspension with  $4.5 \times 10^7$  CFU/mL. (b) Bacterial colony morphology observed in the supernatant of the diluted stock suspension at  $3 \times 10^6$  CFU/mL. For each concentration, the upper area is the bacterial colony morphology for bacterial suspension treated with aptamer-conjugated MNPs, and the lower area is the bacterial colony morphology represent bacterial suspension treated with control, free MNPs.
